# Supplementary material for: Injectable enzymatically crosslinked hydrogels based on a poly(l-glutamic acid) graft copolymer
Source: Royal Society of Chemistry journal article supplement (doi:10.1039/c4py00420e), 2014-01-01
Supplement: c4py00420e1.pdf [file c4py00420e1.pdf]

## **Injectable Enzymatically-crosslinked Hydrogels Based on Poly(L-glutamic acid) Graft Copolymer**

Kaixuan Ren,<sup>a,b</sup> Chaoliang He,<sup>a,\*</sup> Yilong Cheng,<sup>a</sup> Gao Li,<sup>a,\*</sup> and Xuesi Chen<sup>a</sup>

<sup>a</sup> Key Laboratory of Polymer Ecomaterials, Changchun Institute of Applied Chemistry, Chinese Academy of Sciences, Changchun 130022, P. R. China.

<sup>b</sup> University of Chinese Academy of Sciences, Beijing 100039, P. R. China.

\*Corresponding author, E-mail: clhe@ciac.ac.cn (C. He), ligao@ciac.ac.cn (G. Li)

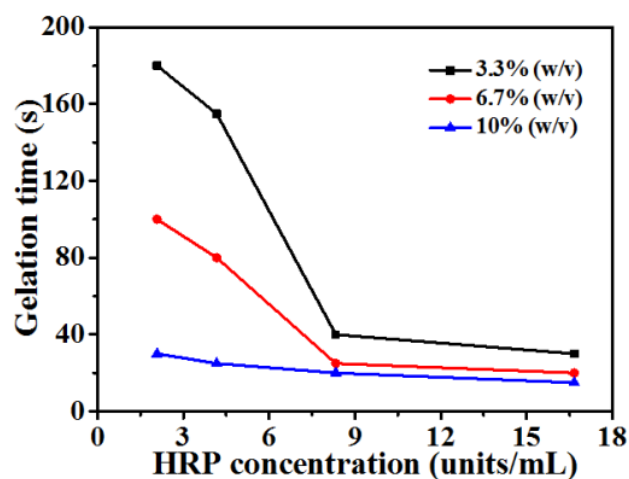

Fig. S1 Dependence of gelation time of PLG-g-TA/PEG hydrogels on PLG-g-TA/PEG concentration. The concentration of  $\text{H}_2\text{O}_2$  was fixed at 0.8 mM. When the final polymer concentration was fixed at 6.7% (w/v), the hydrogels showed appropriate gelation time and the gelation time could be well adjusted by varying the HRP concentration. In addition, it was found that the hydrogels formed from 3.3% (w/v) polymer solution were relatively unstable. Therefore, the final concentration of PLG-g-TA/PEG solution was set at 6.7% (w/v).

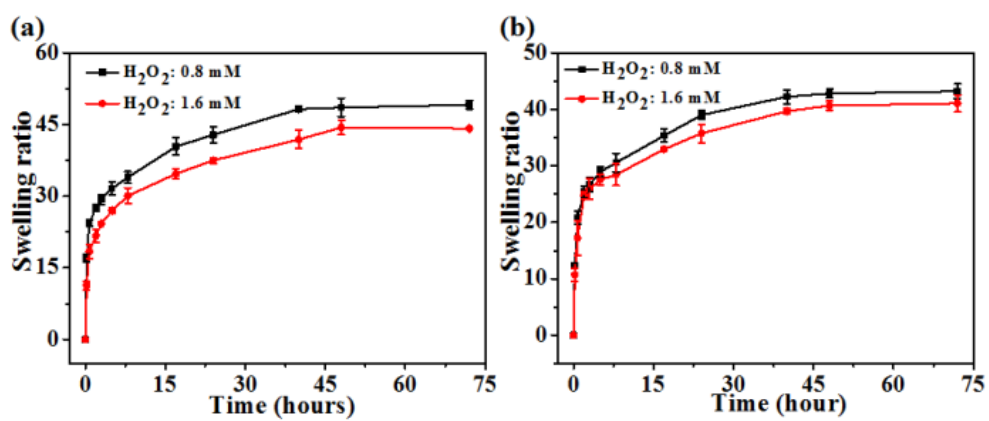

Fig. S2. Swelling ratios of PLG-g-TA/PEG hydrogels: (a) HRP concentration fixed at 2 units/mL; (b) HRP concentration fixed at 4 units/mL (n=3).
